# Supplementary material for: Foldable potassium-ion batteries enabled by free-standing and flexible SnS2@C nanofibers
Source: Royal Society of Chemistry journal article supplement (doi:10.1039/d0ee02919j), 2020-11-23
Supplement: d0ee02919j1.pdf [file d0ee02919j1.pdf]

# Supporting Information

## **Foldable Potassium-Ion Batteries Enabled by Free-standing and Flexible SnS<sub>2</sub>@C Nanofibers**

Deping Li <sup>a,b</sup>, Linna Dai <sup>b</sup>, Xiaohua Ren <sup>c</sup>, Fengjun Ji <sup>a</sup>, Qing Sun <sup>b</sup>, Yamin Zhang <sup>b</sup>, Lijie Ci <sup>a,b\*</sup>

<sup>a</sup> State Key Laboratory of Advanced Welding and Joining, School of Materials Science and Engineering, Harbin Institute of Technology, Shenzhen, 518055, China

<sup>b</sup> Research Center for Carbon Nanomaterials, Key Laboratory for Liquid-Solid Structural Evolution & Processing of Materials (Ministry of Education), School of Materials Science and Engineering, Shandong University, Jinan, 250061, China

<sup>c</sup> School of Water Conservancy and Environment, University of Jinan, Jinan 250022, China

\*Address correspondence to [cilijie@hit.edu.cn](mailto:cilijie@hit.edu.cn).

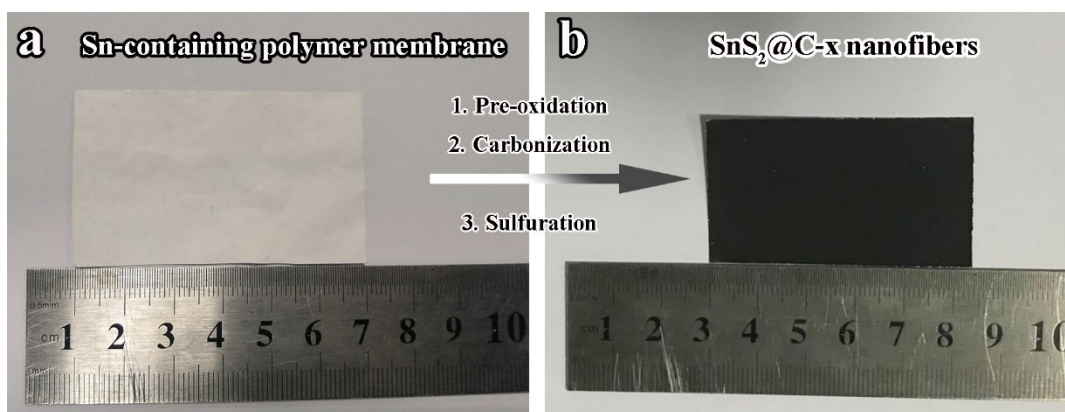

**Figure S1.** Digital photos of (a) Sn-containing polymer membrane and (b)  $\text{SnS}_2@\text{C-x}$  nanofibers.

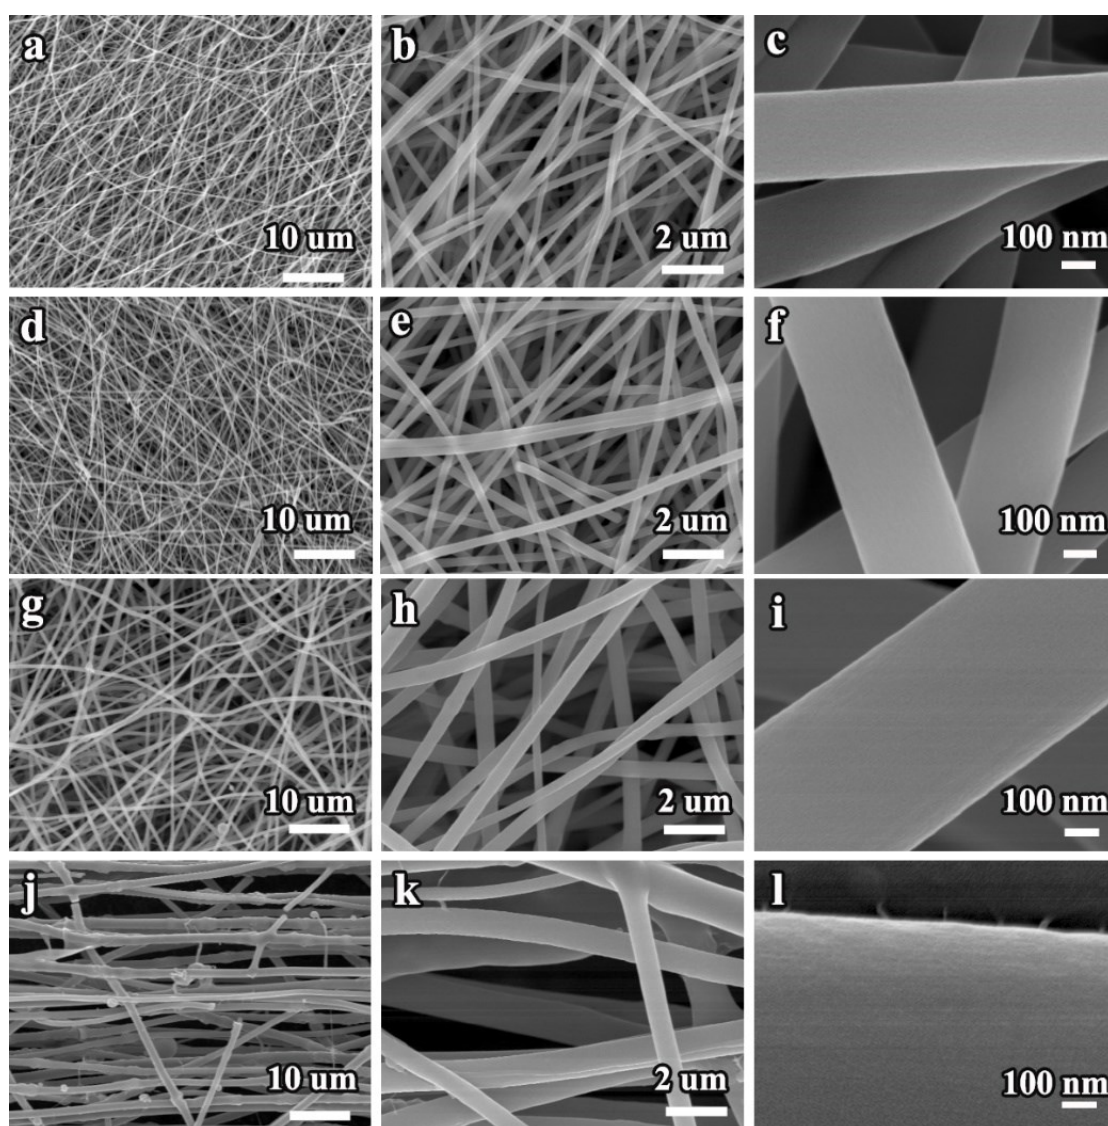

**Figure S2.** SEM images of  $\text{Sn}@\text{C-x}$  nanofibers. (a-c)  $\text{Sn}@\text{C-1}$ , (d-f)  $\text{Sn}@\text{C-2}$ , (g-i)  $\text{Sn}@\text{C-3}$  and (j-l)  $\text{Sn}@\text{C-4}$ .

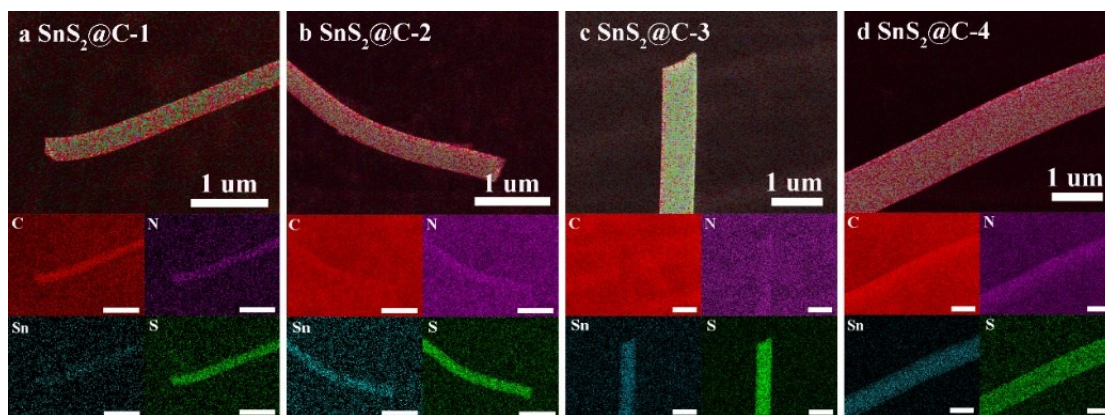

**Figure S3.** EDS mapping results of SnS<sub>2</sub>@C-x nanofibers (C, N, Sn and S). (a) SnS<sub>2</sub>@C-1, (b) SnS<sub>2</sub>@C-2, (c) SnS<sub>2</sub>@C-3 and (d) SnS<sub>2</sub>@C-4.

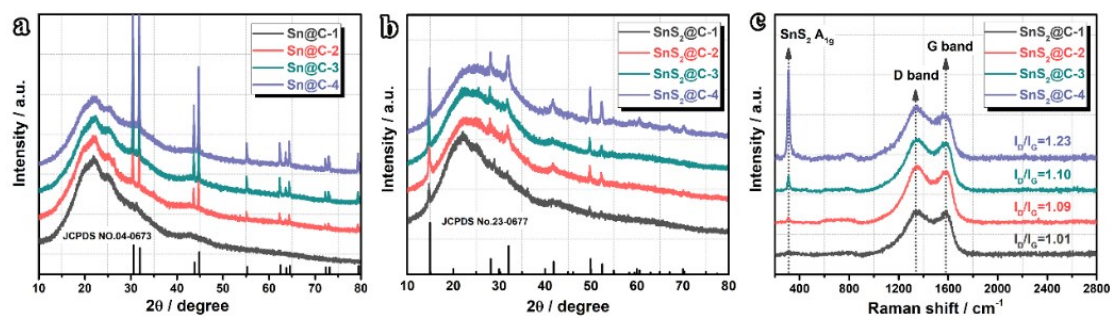

**Figure S4.** Structural analyses. XRD patterns of (a) Sn@C-x and (b) SnS<sub>2</sub>@C-x nanofibers. (c) Raman spectra of SnS<sub>2</sub>@C-x nanofibers.

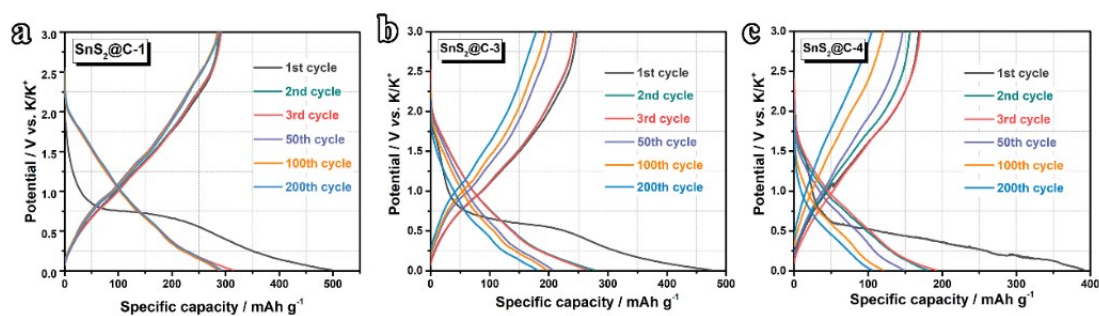

**Figure S5.** Charge-discharge curves of (a) SnS<sub>2</sub>@C-1, (b) SnS<sub>2</sub>@C-3 and (c) SnS<sub>2</sub>@C-4 electrodes.



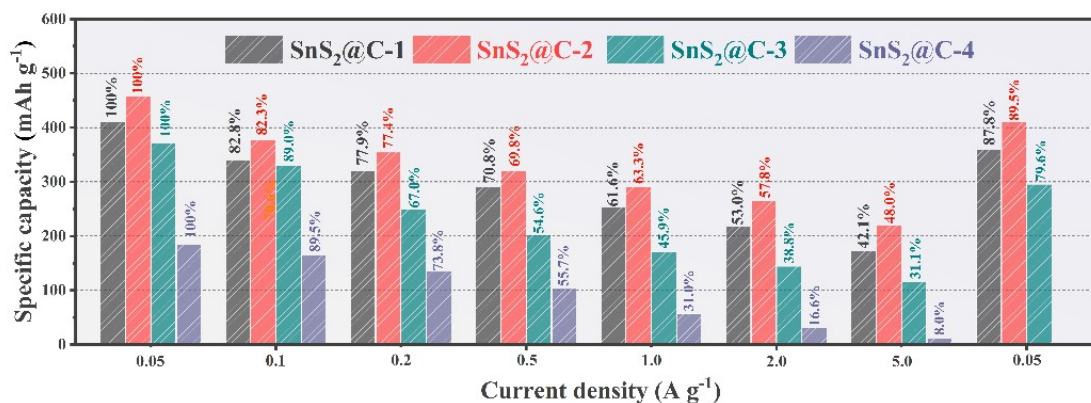

Figure S6. Capacity retention ratios at various current densities.

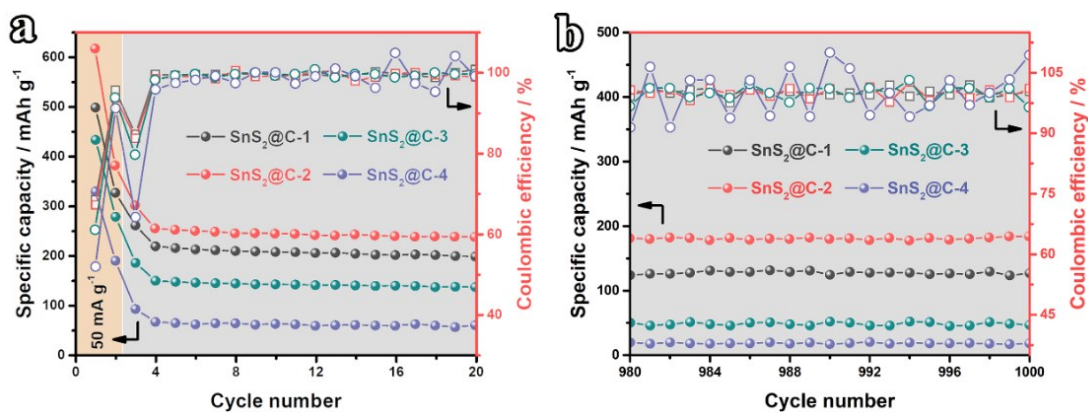

Figure S7. Long-term cycling test (magnified plots of Figure 4d). (a) the initial 20 cycles and (b) the last 20 cycles.

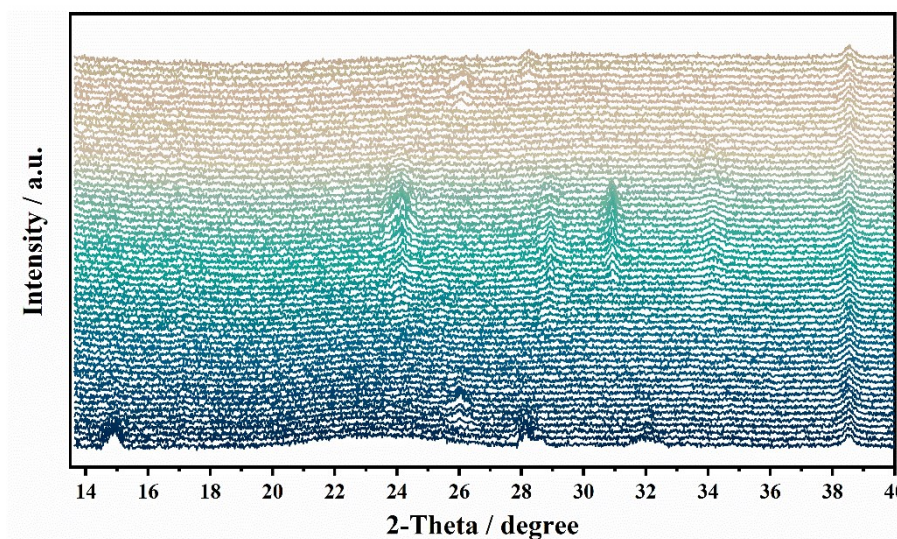

Figure S8. *In situ* XRD results (raw data for plotting Figure 5a).

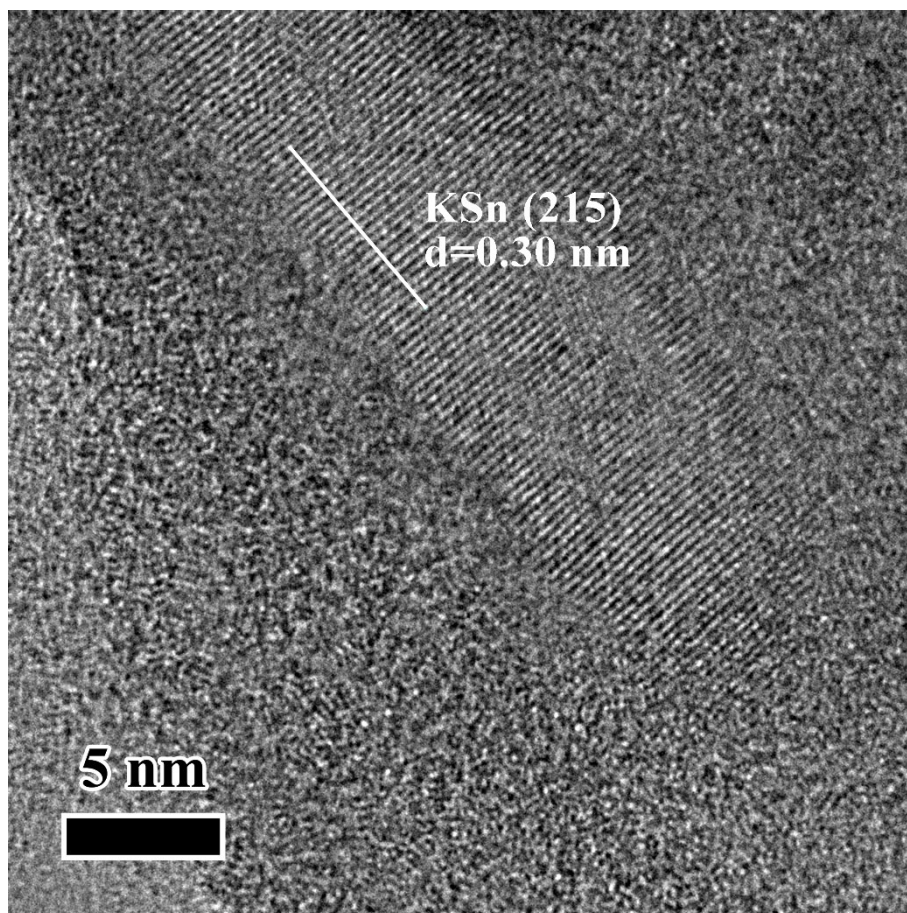

Figure S9 Magnified Figure of Figure 5b.

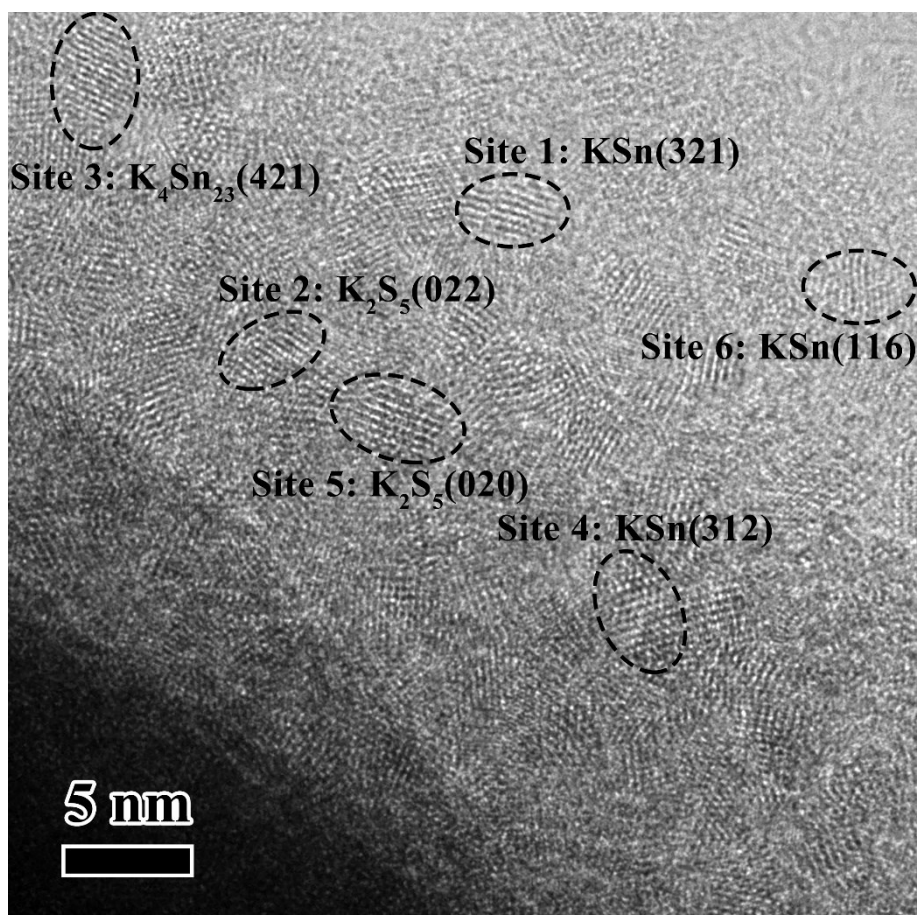

Figure S10 Magnified Figure of Figure 5c.



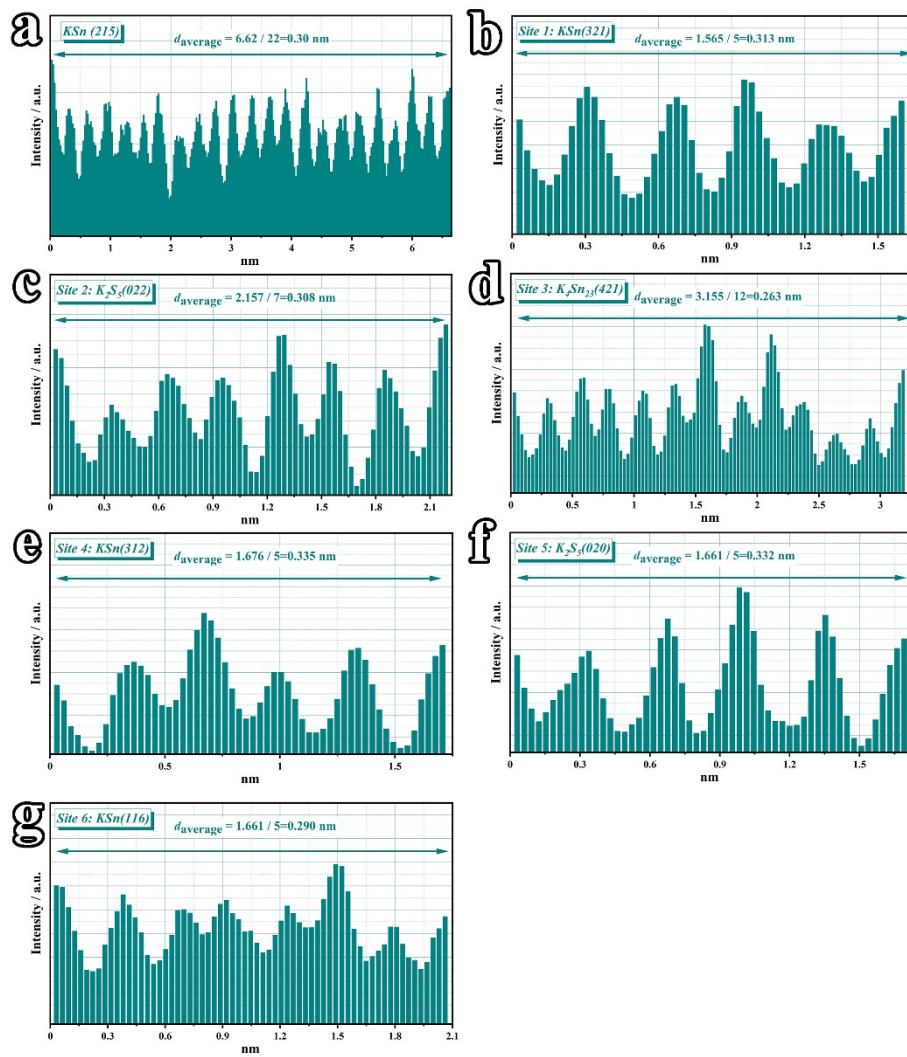

**Figure S11** Profiles for averaging the lattice distances in Figure 5b-c and Figure S9-S10. (a) Plot for Figure 5b and Figure S9. (b-g) Site 1 to site 6 of Figure 5c and Figure S10.

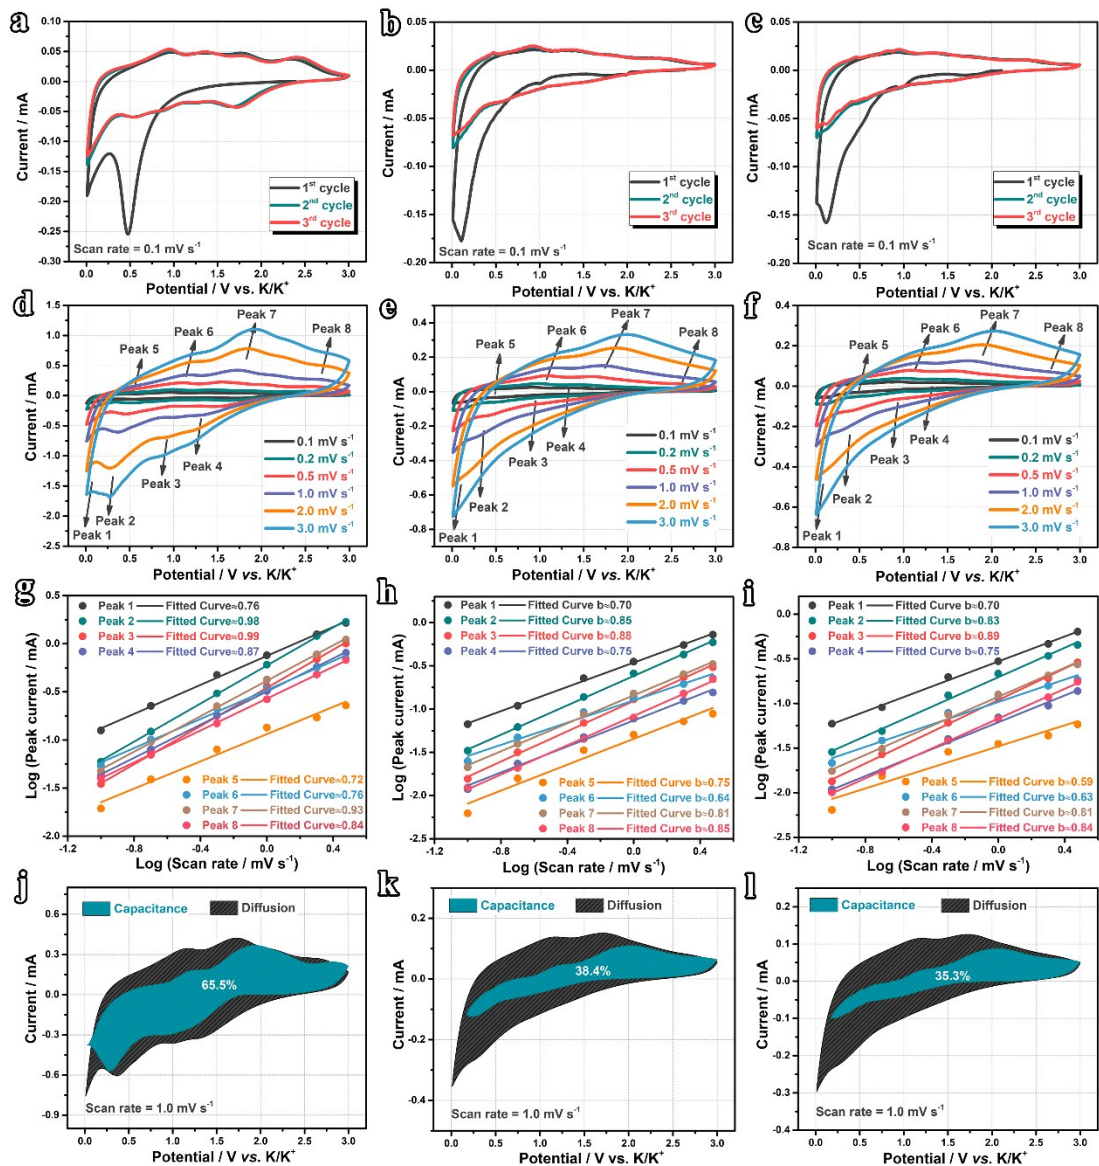

**Figure S12.** Studies on K-ion storage behaviors. CV curves of (a, d) SnS<sub>2</sub>@C-1, (b, e) SnS<sub>2</sub>@C-3 and (c, f) SnS<sub>2</sub>@C-4 electrodes. Plots for *b*-value determination and sketch view of the capacitive contribution at 1.0 mV s<sup>-1</sup>: (g, j) SnS<sub>2</sub>@C-1, (h, k) SnS<sub>2</sub>@C-3 and (i, l) SnS<sub>2</sub>@C-4 electrodes.



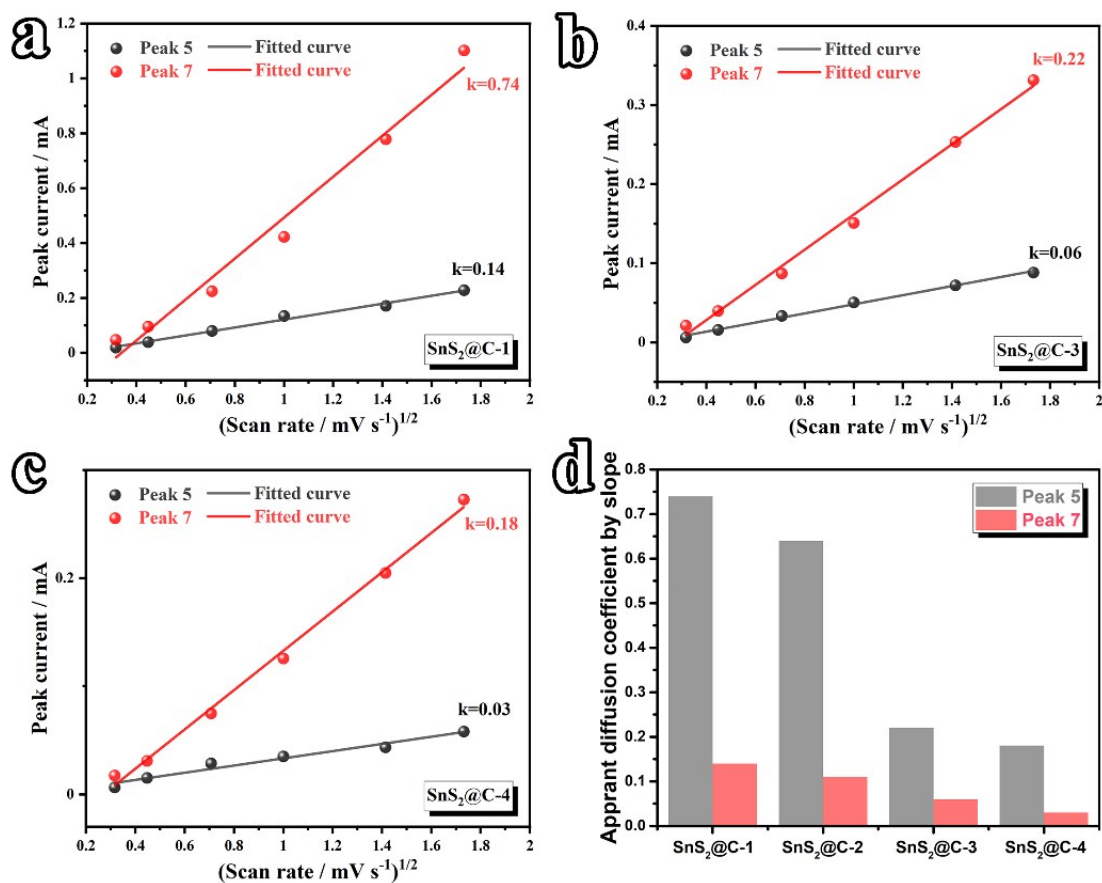

**Figure S13.** Evaluations of K-ion diffusion kinetics. Plots for K-ion diffusion coefficient determination: (a) SnS<sub>2</sub>@C-1, (b) SnS<sub>2</sub>@C-3, (c) SnS<sub>2</sub>@C-4. (d) Survey of the K-ion diffusion coefficient of SnS<sub>2</sub>@C-x electrodes.

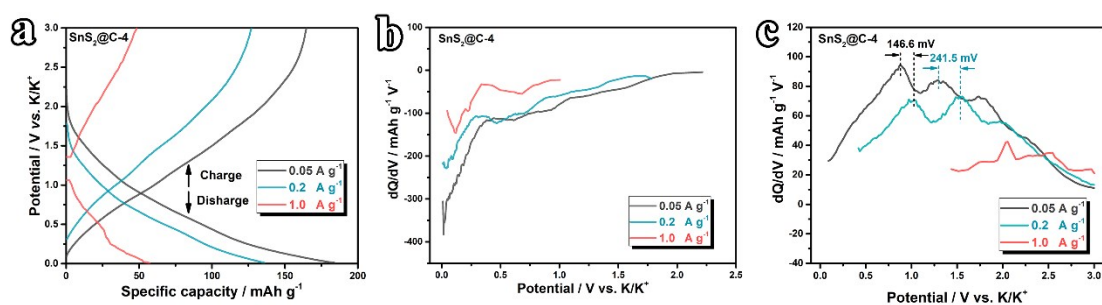

**Figure S14.** (a) Charge-discharge curves, dQ/dV profiles of (d) potassiation and (e) depotassiation processes of SnS<sub>2</sub>@C-4 electrode at selected current densities.

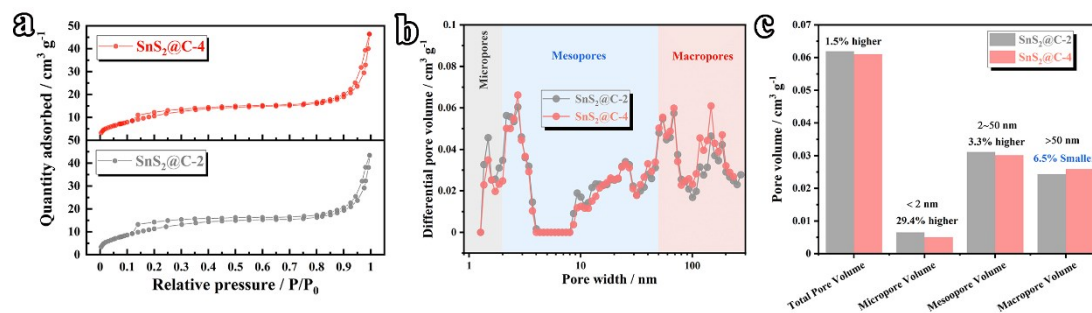

**Figure S15.** Evaluations on pore structure of SnS<sub>2</sub>@C-2 and SnS<sub>2</sub>@C-4. (a) N<sub>2</sub> adsorption-desorption isotherms, (b) pore size distributions calculated by NLDFT model (Non-local density functional theory), (c) pore volume distributions.

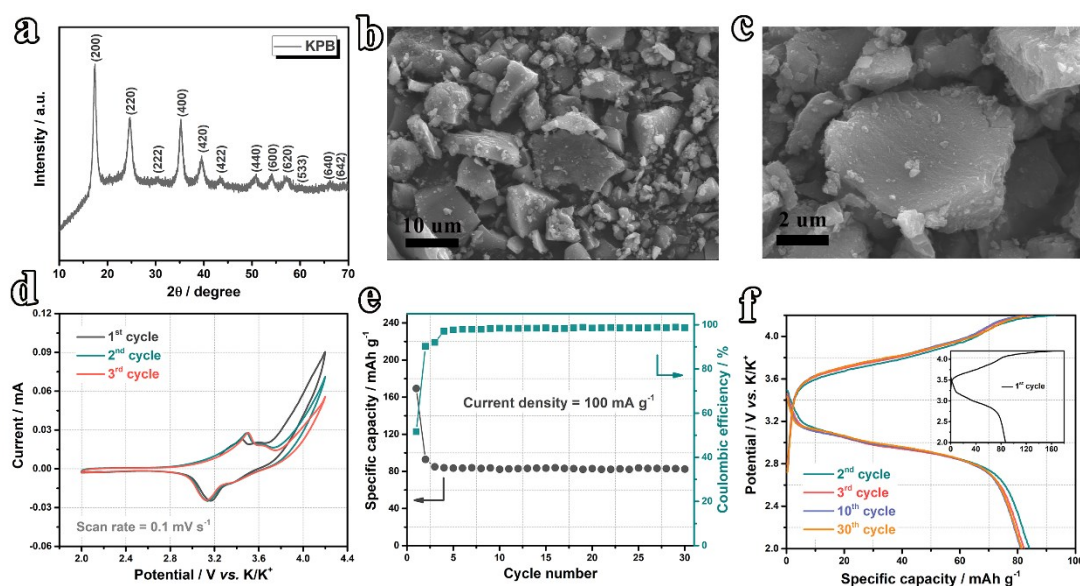

**Figure S16.** Microstructural and electrochemical evaluations of KPB cathode materials. (a) XRD pattern. (b-c) SEM images. (d) CV curves at 0.1 mV s<sup>-1</sup>. (e) Cycling performance and (f) corresponding GCD profiles

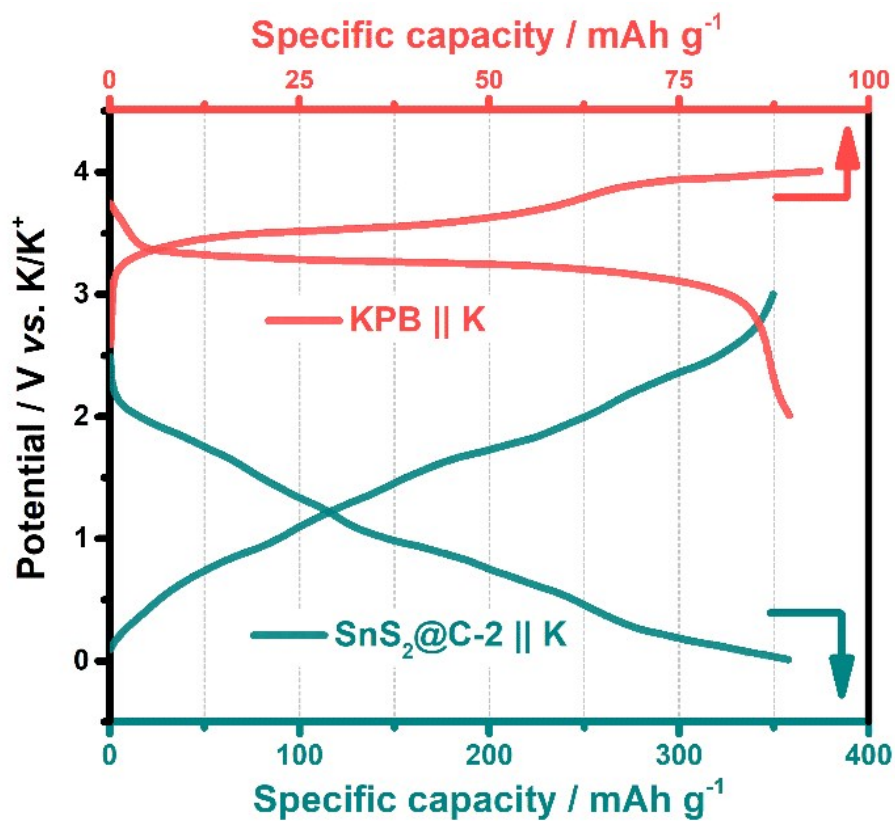

Figure S17. GCD profiles for cathode-anode match before the full-cell assembly.

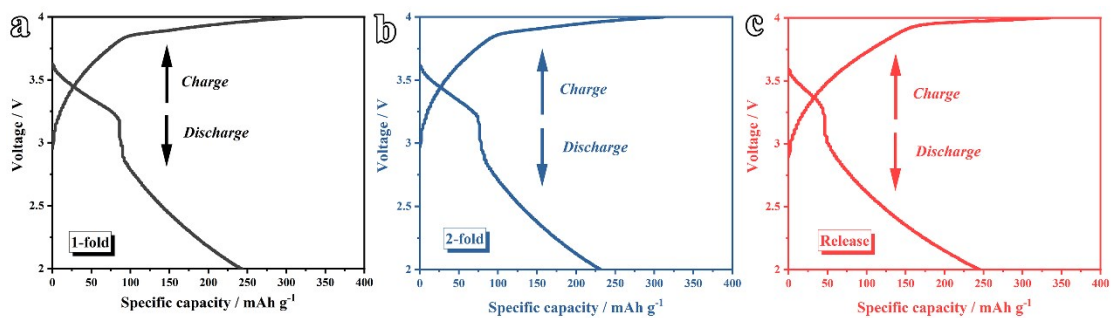

Figure S18. GCD profiles of pouch cell at various deformation states. (a) 1-fold, (b) 2-fold and (c) Final release state.



**Table S1.** A survey of reported anode materials for PIBs.

| Anode Materials                         | Electrolyte                                        | Reversible capacity & Rate capability                                 | Cycling stability                                                      | Refs      |
|-----------------------------------------|----------------------------------------------------|-----------------------------------------------------------------------|------------------------------------------------------------------------|-----------|
| SnS <sub>2</sub> @NCNF                  | 0.8 M KPF <sub>6</sub> in<br>EC:DEC(1:1)           | 457.4 mAh/g@50 mA/g<br>289.7 mAh/g@1000 mA/g<br>219.4 mAh/g@5000 mA/g | 342.2 mAh/g@200 cycles@100 mA/g<br>183.1 mAh/g@1000 cycles@2000 mA/g   | This work |
| <b>Carbonaceous electrode materials</b> |                                                    |                                                                       |                                                                        |           |
| Graphite                                | 0.8 M KPF <sub>6</sub> in<br>EC:DEC(1:1)           | 263 mAh/g@27.9 mA/g<br>80 mAh/g@279 mA/g                              | 100 mAh/g@50 cycles@140 mA/g                                           | <b>1</b>  |
| Soft carbon                             | 0.8 M KPF <sub>6</sub> in<br>EC:DEC(1:1)           | 273 mAh/g@6.975 mA/g<br>140 mAh/g@1395 mA/g                           | 150.6 mAh/g@50 cycles@558 mA/g                                         | <b>1</b>  |
| N-doped graphene                        | 0.8 M KPF <sub>6</sub> in<br>EC:DEC(1:1)           | 200 mAh/g@100 mA/g<br>50 mAh/g@200 mA/g                               | 210 mAh/g@100 cycles@100 mA/g                                          | <b>2</b>  |
| Hard carbon                             | 0.8 M KPF <sub>6</sub> in<br>EC:DEC(1:1)           | 262 mAh/g@28 mA/g<br>136 mAh/g@1400 mA/g                              | 216 mAh/g@100 cycles@28 mA/g                                           | <b>3</b>  |
| Amorphous ordered carbon                | 0.8 M KPF <sub>6</sub> in<br>EC:DEC(1:1)           | 286.4 mAh/g@50 mA/g<br>144.2 mAh/g@1000 mA/g                          | 146.5 mAh/g@1000 cycles@1000 mA/g                                      | <b>4</b>  |
| N-doped hard carbon                     | 0.8 M KPF <sub>6</sub> in<br>EC:DMC(1:1)           | 365 mAh/g@25 mA/g<br>118 mAh/g@3000 mA/g                              | 230.6 mAh/g@100 cycles@50 mA/g<br>123 mAh/g@1100 cycles@1050 mA/g      | <b>5</b>  |
| N-doped carbon nanofiber                | 0.8 M KPF <sub>6</sub> in<br>EC:PC(1:1)            | 238 mAh/g@100 mA/g<br>101 mAh/g@20000 mA/g                            | 248 mAh/g@100 cycles@25 mA/g<br>146 mAh/g@4000 cycles@2000 mA/g        | <b>6</b>  |
| Hierarchical CNT                        | 0.8 M KPF <sub>6</sub> in<br>EC:DEC(1:1)           | ~ 330 mAh/g@50 mA/g<br>162 mAh/g@1600 mA/g                            | 210 mAh/g@500 cycles@100 mA/g                                          | <b>7</b>  |
| Porous carbon nanofiber foam            | 1.0 M KPF <sub>6</sub> in<br>EC:DMC:EMC<br>(4:3:2) | 240 mAh/g@50 mA/g<br>164 mAh/g@1000 mA/g                              | 168 mAh/g@100 cycles@200 mA/g<br>158 mAh/g@2000 cycles@1000 mA/g       | <b>8</b>  |
| Activated hollow carbon nanospheres     | 0.8 M KPF <sub>6</sub> in<br>EC:DEC(1:1)           | 365.5 mAh/g@200 mA/g<br>137 mAh/g@4000 mA/g                           | 192.7 mAh/g@5000 cycles@2000 mA/g<br>144.3 mAh/g@2000 cycles@4000 mA/g | <b>9</b>  |
| N-doped hollow carbon                   | 0.8 M KPF <sub>6</sub> in<br>EC:DEC(1:1)           | 277.8 mAh/g@50 mA/g<br>204.8 mAh/g@2000 mA/g                          | 225.4 mAh/g@1000 cycles@200 mA/g<br>163.1 mAh/g@1600 cycles@1000 mA/g  | <b>10</b> |
| Coal-based carbon                       | 0.8 M KPF <sub>6</sub> in<br>EC:DEC(1:1)           | 260 mAh/g@50 mA/g<br>88 mAh/g@5000 mA/g                               | 118 mAh/g@1200 cycles@1000 mA/g                                        | <b>11</b> |
| Graphite                                | KFSI:EMC<br>with molar ratio<br>of 1:2.5           | 255 mAh/g@20 mA/g                                                     | 255 mAh/g@2000 cycles@20 mA/g                                          | <b>12</b> |
| Defect-rich graphitic nanocarbons       | 0.8 M KPF <sub>6</sub> in<br>EC:DEC(1:1)           | 280 mAh/g@50 mA/g<br>152 mAh/g@1000 mA/g<br>56.6 mAh/g@5000 mA/g      | 189 mAh/g@200 cycles@200 mA/g                                          | <b>13</b> |
| N-doped porous carbon                   | 0.8 M KPF <sub>6</sub> in<br>EC:DEC(1:1)           | 419.7 mAh/g@50 mA/g<br>185 mAh/g@10000 mA/g                           | 342.8 mAh/g@500 cycles@100 mA/g<br>144.4 mAh/g@1000 cycles@5000 mA/g   | <b>14</b> |
| N-doped carbon microspheres             | 0.8 M KPF <sub>6</sub> in<br>EC:DEC(1:1)           | 250 mAh/g@33.6 mA/g<br>156 mAh/g@5040 mA/g                            | 205 mAh/g@200 cycles@33.6 mA/g<br>180 mAh/g@4000 cycles@504 mA/g       | <b>15</b> |

| <b>Non-carbonaceous electrode materials</b>                                             |                                                    |                                              |                                                                      |           |
|-----------------------------------------------------------------------------------------|----------------------------------------------------|----------------------------------------------|----------------------------------------------------------------------|-----------|
| <b>(Including: Intercalation-type, conversion-type, alloying-type and organic type)</b> |                                                    |                                              |                                                                      |           |
| a-Ti <sub>3</sub> C <sub>2</sub> MNRs                                                   | 0.8 M KPF <sub>6</sub> in<br>EC:DEC(1:1)           | 141 mAh/g@20 mA/g<br>60 mAh/g@300 mA/g       | 42 mAh/g@500 cycles@200 mA/g                                         | <b>16</b> |
| TiSe <sub>2</sub>                                                                       | 0.8 M KPF <sub>6</sub> in<br>EC:DEC(1:1)           | 89.0 mAh/g@50 mA/g<br>44.5 mAh/g@1000 mA/g   | ~50 mAh/g@300 cycles@400 mA/g                                        | <b>17</b> |
| K <sub>2</sub> Ti <sub>8</sub> O <sub>17</sub>                                          | 0.8 M KPF <sub>6</sub> in<br>EC:DEC(1:1)           | ~120 mAh/g@20 mA/g<br>44.2 mAh/g@500 mA/g    | 110.7 mAh/g@50 cycles@20 mA/g                                        | <b>18</b> |
| MoS <sub>2</sub> @rGO                                                                   | 0.8 M KPF <sub>6</sub> in<br>EC:DEC(1:1)           | 427 mAh/g@50 mA/g<br>178 mAh/g@500 mA/g      | 381 mAh/g@100 cycles@100 mA/g                                        | <b>19</b> |
| Co <sub>3</sub> O <sub>4</sub> -Fe <sub>2</sub> O <sub>3</sub> /C                       | 0.75 M KPF <sub>6</sub> in<br>EC:DEC(1:1)          | Not mentioned                                | 220 mAh/g@50 cycles@50 mA/g                                          | <b>20</b> |
| CoS@G-25                                                                                | 0.6 M KPF <sub>6</sub> in<br>EC:DEC(1:1)           | ~420 mAh/g@500 mA/g<br>~220 mAh/g@4000 mA/g  | 310.8 mAh/g@100 cycles@500 mA/g                                      | <b>21</b> |
| FeCl <sub>3</sub> @C                                                                    | 0.8 M KPF <sub>6</sub> in<br>EC:DEC(1:1)           | 269.5 mAh/g@50 mA/g<br>133.1 mAh/g@5000 mA/g | 224.1 mAh/g@500 cycles@100 mA/g<br>106.1 mAh/g@1300 cycles@2000 mA/g | <b>22</b> |
| CoP@C                                                                                   | 0.8 M KPF <sub>6</sub> in<br>EC:DMC:DEC<br>(1:1:1) | 174 mAh/g@50 mA/g<br>54 mAh/g@2000 mA/g      | 127 mAh/g@1000 cycles@100 mA/g<br>114 mAh/g@1000 cycles@500 mA/g     | <b>23</b> |
| FeS <sub>2</sub> @C                                                                     | 1.0 M KPF <sub>6</sub> in<br>EC:PC(1:1)            | 360 mAh/g@1000 mA/g<br>203 mAh/g@10000 mA/g  | 270 mAh/g@1000 cycles@300 mA/g<br>162 mAh/g@1000 cycles@1000 mA/g    | <b>24</b> |
| V <sub>5</sub> S <sub>8</sub> @C                                                        | 1.0 M KFSI in<br>EC:PC(1:1)                        | 474 mAh/g@100 mA/g<br>153 mAh/g@10000 mA/g   | 360 mAh/g@500 cycles@500 mA/g<br>190 mAh/g@1000 cycles@2000 mA/g     | <b>25</b> |
| MoSe <sub>2</sub> /Mxene                                                                | 1.0 M KFSI in<br>EC:DEC(1:1)                       | 350 mAh/g@100 mA/g<br>183 mAh/g@10000 mA/g   | 355 mAh/g@100 cycles@200 mA/g<br>207 mAh/g@300 cycles@5000 mA/g      | <b>26</b> |
| Bi/rGO                                                                                  | 1.0 M KFSI in<br>EC:DEC(1:1)                       | 309 mAh/g@100 mA/g<br>235 mAh/g@500 mA/g     | 290 mAh/g@50 cycles@50 mA/g                                          | <b>27</b> |
| Sn/C                                                                                    | 0.8 M KClO <sub>4</sub> in<br>EC:DEC(1:1)          | 310 mAh/g@50 mA/g<br>150 mAh/g@500 mA/g      | 276.4 mAh/g@100 cycles@50 mA/g                                       | <b>28</b> |
| Sb/Carbon<br>shpere network                                                             | 4.0 M KTFSI in<br>EC:DEC(1:1)                      | 589 mAh/g@50 mA/g<br>530 mAh/g@200 mA/g      | 551 mAh/g@100 cycles@100 mA/g<br>504 mAh/g@220 cycles@200 mA/g       | <b>29</b> |
| Sb/Carbon<br>nanosheets                                                                 | 1.0 M KPF <sub>6</sub> in<br>EC:DMC(1:1)           | 395.5 mAh/g@50 mA/g<br>101.4 mAh/g@2000 mA/g | 288.2 mAh/g@50 cycles@50 mA/g<br>247 mAh/g@600 cycles@200 mA/g       | <b>30</b> |
| Red P@CNFs                                                                              | 0.7 M KPF <sub>6</sub> in<br>EC:DEC(1:1)           | 745 mAh/g@100 mA/g<br>342 mAh/g@5000 mA/g    | 650 mAh/g@100 cycles@100 mA/g<br>282 mAh/g@800 cycles@5000 mA/g      | <b>31</b> |
| Amorphous Ge                                                                            | 0.8 M KPF <sub>6</sub> in<br>EC:DEC(1:1)           | 350 mAh/g@200 mA/g<br>125 mAh/g@1200 mA/g    | 210 mAh/g@100 cycles@80 mA/g<br>175 mAh/g@200 cycles@240 mA/g        | <b>32</b> |
| GeP <sub>5</sub>                                                                        | 1.0 M KFSI in<br>EC:DEC(1:1)                       | 721.8 mAh/g@20 mA/g<br>284.2 mAh/g@1000 mA/g | 495.1 mAh/g@50 cycles@50 mA/g<br>213.7 mAh/g@2000 cycles@500 mA/g    | <b>33</b> |
| Sn <sub>4</sub> P <sub>3</sub> /C                                                       | 0.8 M KPF <sub>6</sub> in<br>EC:DEC(1:1)           | 399.4 mAh/g@50 mA/g<br>221.9 mAh/g@1000 mA/g | 307.2 mAh/g@50 cycles@50 mA/g                                        | <b>34</b> |
| Sn <sub>4</sub> P <sub>3</sub> @Carbon<br>Fiber                                         | 1.0 M KFSI in<br>EC:DEC(1:1)                       | 514.7 mAh/g@50 mA/g<br>169.6 mAh/g@2000 mA/g | 403.1 mAh/g@200 cycles@50 mA/g<br>160.7 mAh/g@1000 cycles@500 mA/g   | <b>35</b> |
| PASP@SnS <sub>2</sub> @                                                                 | 1 M KFSI in                                        | 564 mAh/g @ 50 mA/g                          | 372 mAh/g @ 100 cycles @100 mA/g                                     | <b>36</b> |

|                                                 |                            |                       |                                  |           |
|-------------------------------------------------|----------------------------|-----------------------|----------------------------------|-----------|
| CN                                              | DME                        | 273 mAh/g @ 2000 mA/g | 269 mAh/g @ 500 cycles @500 mA/g |           |
| SnS <sub>2</sub> @C@rGO                         | 0.8 M KPF <sub>6</sub> in  | 499.4 mAh/g@50 mA/g   | 309.1 mAh/g@100 cycles@100 mA/g  | <b>37</b> |
|                                                 | EC:DEC(1:1)                | 287.5 mAh/g@500 mA/g  | 298.1 mAh/g@500 cycles@500 mA/g  |           |
| SeS <sub>2</sub> @NCNFs                         | 0.7 M KPF <sub>6</sub> in  | 751 mAh/g@50 mA/g     | 703 mAh/g@150 cycles@50 mA/g     | <b>38</b> |
|                                                 | EC:DEC(1:1)                | 372 mAh/g@2000 mA/g   | 417 mAh/g@1000 cycles@500 mA/g   |           |
| Sb <sub>2</sub> S <sub>3</sub> /C               | 1.0 M KSiF <sub>6</sub> in | ~500 mAh/g@50 mA/g    | ~500 mAh/g@500 cycles@50 mA/g    | <b>39</b> |
|                                                 | EC:PC(1:1)                 | ~50 mAh/g@1000 mA/g   | 404 mAh/g@200 cycles@500 mA/g    |           |
| SnSb@NC                                         | 0.5 M KPF <sub>6</sub> in  | 357.2 mAh/g@50 mA/g   | 185.8 mAh/g@200 cycles@500 mA/g  | <b>40</b> |
|                                                 | DME                        | 116.6 mAh/g@2000 mA/g |                                  |           |
| (Bi,Sb) <sub>2</sub> S <sub>3</sub><br>Nanotube | 3.0 M KFSI in              | 611 mAh/g@100 mA/g    | 353 mAh/g@1000 cycles@500 mA/g   | <b>41</b> |
|                                                 | DME                        | 300 mAh/g@1000 mA/g   |                                  |           |
| Amorphous<br>black P@C                          | 0.8 M KPF <sub>6</sub> in  | 367 mAh/g@50 mA/g     | 71.5 mAh/g@500 cycles@500 mA/g   | <b>42</b> |
|                                                 | EC:DEC(1:1)                | 90 mAh/g@500 mA/g     |                                  |           |
| Sb <sub>2</sub> MoO <sub>6</sub> /rGO           | 3.0 M KFSI in              | 402 mAh/g@100 mA/g    | 381 mAh/g@50 cycles@200 mA/g     | <b>43</b> |
|                                                 | DME                        | 161 mAh/g@1000 mA/g   |                                  |           |
| K <sub>2</sub> PC                               | 1.0 M KFSI in              | 245 mAh/g@11 mA/g     | 190 mAh/g@100 cycles@44 mA/g     | <b>44</b> |
|                                                 | EC:DMC(1:1)                | 79 mAh/g@440 mA/g     |                                  |           |
| K <sub>2</sub> TP                               | 1.0 M KPF <sub>6</sub> in  | 261 mAh/g@50 mA/g     | 229 mAh/g@100 cycles@200 mA/g    | <b>45</b> |
|                                                 | DME                        | 185 mAh/g@1000 mA/g   | 194 mAh/g@500 cycles@1000 mA/g   |           |
| PyBT                                            | 0.8 M KPF <sub>6</sub> in  | 358 mAh/g@30 mA/g     | 272 mAh/g@500 cycles@500 mA/g    | <b>46</b> |
|                                                 | EC:DEC(1:1)                | 104 mAh/g@500 mA/g    |                                  |           |

## References

- Z. Jian, W. Luo and X. Ji, *Journal of the American Chemical Society*, 2015, **137**, 11566-11569.
- K. Share, A. P. Cohn, R. Carter, B. Rogers and C. L. Pint, *ACS Nano*, 2016, **10**, 9738-9744.
- Z. Jian, Z. Xing, C. Bommier, Z. Li and X. Ji, *Advanced Energy Materials*, 2016, **6**, 1501874.
- W. Wang, J. Zhou, Z. Wang, L. Zhao, P. Li, Y. Yang, C. Yang, H. Huang and S. Guo, *Advanced Energy Materials*, 2018, **8**, 1701648.
- J. Yang, Z. Ju, Y. Jiang, Z. Xing, B. Xi, J. Feng and S. Xiong, *Advanced Materials*, 2018, **30**, 1700104.
- Y. Xu, C. Zhang, M. Zhou, Q. Fu, C. Zhao, M. Wu and Y. Lei, *Nature Communications*, 2018, **9**, 1720.
- Y. Wang, Z. Wang, Y. Chen, H. Zhang, M. Yousaf, H. Wu, M. Zou, A. Cao and R. P. S. Han, *Advanced Materials*, 2018, **30**, 1802074.
- H. Li, Z. Cheng, Q. Zhang, A. Natan, Y. Yang, D. Cao and H. Zhu, *Nano Letters*, 2018, **18**, 7407-7413.
- G. Wang, X. Xiong, D. Xie, Z. Lin, J. Zheng, F. Zheng, Y. Li, Y. Liu, C. Yang and M. Liu, *Journal of Materials Chemistry A*, 2018, **6**, 24317-24323.
- W. Yang, J. Zhou, S. Wang, W. Zhang, Z. Wang, F. Lv, K. Wang, Q. Sun and S. Guo, *Energy & Environmental Science*, 2019, **12**, 1605-1612.
- N. Xiao, X. Zhang, C. Liu, Y. Wang, H. Li and J. Qiu, *Carbon*, 2019, **147**, 574-581.
- L. Fan, R. Ma, Q. Zhang, X. Jia and B. Lu, *Angewandte Chemie International Edition*, 2019,



- 58**, 10500-10505.
13. W. Zhang, J. Ming, W. Zhao, X. Dong, M. N. Hedhili, P. M. F. J. Costa and H. N. Alshareef, *Advanced Functional Materials* 2019, **29**, 1903641.
  14. D. Li, X. Ren, Q. Ai, Q. Sun, L. Zhu, Y. Liu, Z. Liang, R. Peng, P. Si, J. Lou, J. Feng and L. Ci, *Advanced Energy Materials*, 2018, **8**, 1802386.
  15. C. Chen, Z. Wang, B. Zhang, L. Miao, J. Cai, L. Peng, Y. Huang, J. Jiang, Y. Huang, L. Zhang and J. Xie, *Energy Storage Materials*, 2017, **8**, 161-168.
  16. P. Lian, Y. Dong, Z.-S. Wu, S. Zheng, X. Wang, W. Sen, C. Sun, J. Qin, X. Shi and X. Bao, *Nano Energy*, 2017, **40**, 1-8.
  17. P. Li, X. Zheng, H. Yu, G. Zhao, J. Shu, X. Xu, W. Sun and S. X. Dou, *Energy Storage Materials*, 2019, **16**, 512-518.
  18. J. Han, M. Xu, Y. Niu, G.-N. Li, M. Wang, Y. Zhang, M. Jia and C. m. Li, *Chemical Communications*, 2016, **52**, 11274-11276.
  19. K. Xie, K. Yuan, X. Li, W. Lu, C. Shen, C. Liang, R. Vajtai, P. Ajayan and B. Wei, *Small*, 2017, **13**, 1701471.
  20. I. Sultana, M. M. Rahman, S. Mateti, V. G. Ahmadabadi, A. M. Glushenkov and Y. Chen, *Nanoscale*, 2017, **9**, 3646-3654.
  21. H. Gao, T. Zhou, Y. Zheng, Q. Zhang, Y. Liu, J. Chen, H. Liu and Z. Guo, *Advanced Functional Materials*, 2017, **27**, 1702634.
  22. D. Li, M. Zhu, L. Chen, L. Chen, W. Zhai, Q. Ai, G. Hou, Q. Sun, Y. Liu, Z. Liang, S. Guo, J. Lou, P. Si, J. Feng, L. Zhang and L. Ci, *Advanced Materials Interfaces*, 2018, **5**, 1800606.
  23. J. Bai, B. Xi, H. Mao, Y. Lin, X. Ma, J. Feng and S. Xiong, *Advanced Materials*, 2018, **30**, 1802310.
  24. Y. Zhao, J. Zhu, S. J. H. Ong, Q. Yao, X. Shi, K. Hou, Z. J. Xu and L. Guan, *Advanced Energy Materials*, 2018, **8**, 1802565.
  25. L. Li, W. Zhang, X. Wang, S. Zhang, Y. Liu, M. Li, G. Zhu, Y. Zheng, Q. Zhang, T. Zhou, W. K. Pang, W. Luo, Z. Guo and J. Yang, *ACS Nano*, 2019, **13**, 7939-7948.
  26. H. Huang, J. Cui, G. Liu, R. Bi and L. Zhang, *ACS Nano*, 2019, **13**, 3448-3456.
  27. Q. Zhang, J. Mao, W. K. Pang, T. Zheng, V. Sencadas, Y. Chen, Y. Liu and Z. Guo, *Advanced Energy Materials*, 2018, **8**, 1703288.
  28. K. Huang, Z. Xing, L. Wang, X. Wu, W. Zhao, X. Qi, H. Wang and Z. Ju, *Journal of Materials Chemistry A*, 2018, **6**, 434-442.
  29. J. Zheng, Y. Yang, X. Fan, G. Ji, X. Ji, H. Wang, S. Hou, M. R. Zachariah and C. Wang, *Energy & Environmental Science*, 2019, **12**, 615-623.
  30. Y. Han, T. Li, Y. Li, J. Tian, Z. Yi, N. Lin and Y. Qian, *Energy Storage Materials*, 2019, **20**, 46-54.
  31. Y. Wu, S. Hu, R. Xu, J. Wang, Z. Peng, Q. Zhang and Y. Yu, *Nano Letters*, 2019, **19**, 1351-1358.
  32. Z. Yi, N. Lin, T. Li, Y. Han, Y. Li and Y. Qian, *Nano Research*, 2019, **12**, 1824-1830.
  33. W. Zhang, Z. Wu, J. Zhang, G. Liu, N.-H. Yang, R.-S. Liu, W. K. Pang, W. Li and Z. Guo, *Nano Energy*, 2018, **53**, 967-974.
  34. W. Zhang, J. Mao, S. Li, Z. Chen and Z. Guo, *Journal of the American Chemical Society*, 2017, **139**, 3316-3319.
  35. W. Zhang, W. K. Pang, V. Sencadas and Z. Guo, *Joule*, 2018, **2**, 1534-1547.

36. G. Qin, Y. Liu, P. Han, L. Wang, F. Liu, J. Ma, *Adv. Funct. Mater.* 2020, 30 (45) 2005080.
37. D. Li, Q. Sun, Y. Zhang, L. Chen, Z. Wang, Z. Liang, P. Si and L. Ci, *ChemSusChem*, 2019, 12, 2689-2700.
38. Y. Yao, R. Xu, M. Chen, X. Cheng, S. Zeng, D. Li, X. Zhou, X. Wu and Y. Yu, *ACS Nano*, 2019, 13, 4695-4704.
39. Y. Liu, Z. Tai, J. Zhang, W. K. Pang, Q. Zhang, H. Feng, K. Konstantinov, Z. Guo and H. K. Liu, *Nature Communications*, 2018, 9, 3645.
40. Z. Wang, K. Dong, D. Wang, S. Luo, Y. Liu, Q. Wang, Y. Zhang, A. Hao, C. Shi and N. Zhao, *Journal of Materials Chemistry A*, 2019, 7, 14309-14318.
41. J. Wang, L. Fan, Z. Liu, S. Chen, Q. Zhang, L. Wang, H. Yang, X. Yu and B. Lu, *ACS Nano*, 2019, 13, 3703-3713.
42. X. Wu, W. Zhao, H. Wang, X. Qi, Z. Xing, Q. Zhuang and Z. Ju, *Journal of Power Sources*, 2018, 378, 460-467.
43. J. Wang, B. Wang, Z. Liu, L. Fan, Q. Zhang, H. Ding, L. Wang, H. Yang, X. Yu and B. Lu, *Advanced Science*, 2019, 6, 1900904.
44. Q. Deng, J. Pei, C. Fan, J. Ma, B. Cao, C. Li, Y. Jin, L. Wang and J. Li, *Nano Energy*, 2017, 33, 350-355.
45. K. Lei, F. Li, C. Mu, J. Wang, Q. Zhao, C. Chen and J. Chen, *Energy & Environmental Science*, 2017, 10, 552-557.
46. C. Zhang, Y. Qiao, P. Xiong, W. Ma, P. Bai, X. Wang, Q. Li, J. Zhao, Y. Xu, Y. Chen, J. H. Zeng, F. Wang, Y. Xu and J.-X. Jiang, *ACS Nano*, 2019, 13, 745-754.
